# Supplementary material
Source: HighWire-hosted journal article supplement (https://bmjopen.bmj.com/content/9/6/e030019)
Supplement: inline-supplementary-material-1 [file inline-supplementary-material-1.pdf]

## Search strategy used in the PubMed

PubMed:

- #1 “Catheter Related Infection”[MeSH]
- #2 Catheter Related Infection\*[Title/Abstract] OR Catheter-Related Infection\*[Title/Abstract] OR Catheter Associated Infection\*[Title/Abstract] OR Catheter-Associated Infection\*[Title/Abstract]
- #3 #1 OR #2
- #4 “Infection” [MeSH]
- #5 infection\*[Title/Abstract]
- #6 bacteremia\*[Title/Abstract]
- #7 bacteraemia\*[Title/Abstract]
- #8 sepsis[Title/Abstract]
- #9 fungemia\*[Title/Abstract]
- #10 pyemia\*[Title/Abstract]
- #11 pyohemia\*[Title/Abstract]
- #12 pyaemia\*[Title/Abstract]
- #13 septicemia\*[Title/Abstract]
- #14 "blood poisoning"[Title/Abstract]
- #15 "blood poisonings"[Title/Abstract]
- #16 CRB[Title/Abstract]
- #17 CRI[Title/Abstract]
- #18 CRBSI[Title/Abstract]
- #19 #3 OR #4 OR #5 OR #6 OR #7 OR #8 OR #9 OR #10 OR #11 OR #12 OR #13 OR #14 OR #15 OR #16 OR #17 OR #18
- #20 “Catheters, Indwelling” [MeSH]
- #21 “Central Venous Catheter” [MeSH]
- #22 “Catheterization, Central Venous” [MeSH]
- #23 catheter\*[Title/Abstract]
- #24 "central venous line"[Title/Abstract]
- #25 "central line"[Title/Abstract]
- #26 "central venous lines"[Title/Abstract]
- #27 "central lines"[Title/Abstract]
- #28 #29 OR #30 OR #31 OR #32 OR #33 OR #34 OR #35 OR #36
- #29 random\*[ Title/Abstract]
- #30 “Randomized Controlled Trial”[Publication Type]
- #31 “Randomized Controlled Trial as Topic” [MeSH]
